# Supplementary material
Source: MDPI journal article supplement (https://www.mdpi.com/2504-3129/2/4/29)
Supplement: s1 [file s1]

# SUPPLEMENTARY INFORMANTION

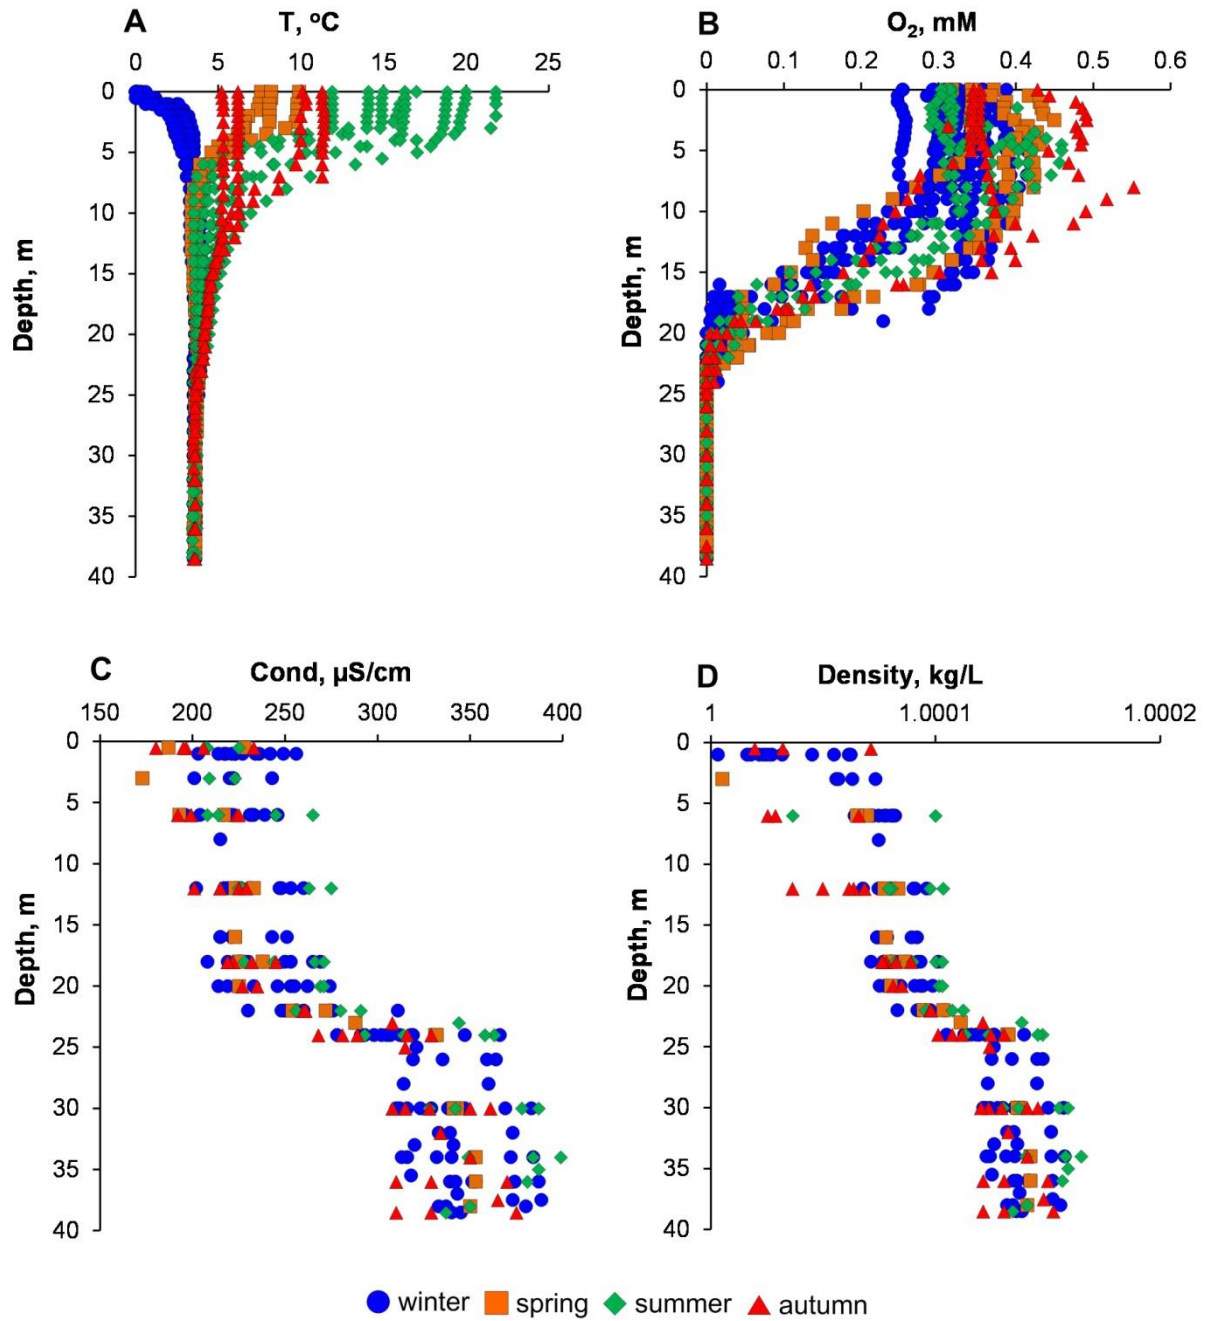

**Figure S1.** Vertical and seasonal variability of values of temperature (A), oxygen concentration (B), specific electrical conductivity (C) and density (D). Density values are based on conductivity and temperature values. Density values less than 1 were observed for horizons of 0–6 meters in summer and autumn.



|                                 |     |     |       |       |    |    |     |     |     |     |     |     |     |     |     |     |      |      |
|---------------------------------|-----|-----|-------|-------|----|----|-----|-----|-----|-----|-----|-----|-----|-----|-----|-----|------|------|
| 0–5                             | 0.1 | 3.3 | 0.00  | 0.06  | 3  | 11 | 4   | 12  | 1   | 18  | 10  | 27  | 302 | 317 | 7.8 | 7.9 | 14.1 | 20.0 |
|                                 | 0.7 |     | 0.00  |       | 6  |    | 6   |     | 8   |     | 13  |     | 317 |     | 7.8 |     | 16.3 |      |
| 5–10                            | 0.4 | 0.8 | 0.00  | 0.07  | 4  | 13 | 5   | 14  | 6   | 7   | 10  | 15  | 307 | 456 | 7.4 | 8.0 | 4.1  | 9.4  |
|                                 | 0.7 |     | 0.01  |       | 8  |    | 9   |     | 7   |     | 11  |     | 403 |     | 7.6 |     | 6.1  |      |
| 10–15                           | 0.2 | 0.8 | 0.00  | 0.04  | 2  | 6  | 3   | 6   | 4   | 6   | 7   | 24  | 264 | 339 | 7.2 | 7.8 | 3.5  | 4.5  |
|                                 | 0.6 |     | 0.02  |       | 5  |    | 6   |     | 4   |     | 10  |     | 302 |     | 7.3 |     | 3.9  |      |
| 15–20                           | 0.4 | 1.4 | 0.000 | 0.10  | 2  | 12 | 3   | 13  | 3   | 43  | 9   | 46  | 6   | 127 | 6.8 | 7.6 | 3.6  | 4.0  |
|                                 | 0.7 |     | 0.01  |       | 6  |    | 7   |     | 7   |     | 12  |     | 43  |     | 7.0 |     | 3.9  |      |
| 20–25                           | 4   | 112 | 0.2   | 1.5   | 3  | 10 | 9   | 123 | 15  | 107 | 24  | 184 | 0   | 13  | 7.0 | 7.7 | 3.5  | 4.0  |
|                                 | 78  |     | 0.6   |       | 7  |    | 85  |     | 45  |     | 119 |     | 0   |     | 7.1 |     | 3.7  |      |
| 25–30                           | 119 | 190 | 0.5   | 1.8   | 5  | 15 | 163 | 197 | 88  | 246 | 199 | 298 | 0   | 0   | 6.8 | 7.2 | 3.5  | 3.7  |
|                                 | 153 |     | 0.9   |       | 10 |    | 167 |     | 101 |     | 262 |     | 0   |     | 7.0 |     | 3.6  |      |
| 30–35                           | 163 | 195 | 0.7   | 1.8   | 5  | 14 | 176 | 201 | 43  | 260 | 244 | 274 | 0   | 0   | 6.9 | 7.2 | 3.6  | 3.7  |
|                                 | 195 |     | 1.3   |       | 8  |    | 201 |     | 151 |     | 259 |     | 0   |     | 7.0 |     | 3.6  |      |
| 35–bott.                        | 130 | 193 | 0.4   | 1.7   | 5  | 14 | 184 | 198 | 42  | 250 | 180 | 276 | 0   | 0   | 6.7 | 7.3 | 3.5  | 3.7  |
|                                 | 175 |     | 0.8   |       | 10 |    | 190 |     | 146 |     | 252 |     | 0   |     | 7.0 |     | 3.6  |      |
| Autumn<br>(September – October) |     |     |       |       |    |    |     |     |     |     |     |     |     |     |     |     |      |      |
| 0–5                             | 0.8 | 3.5 | 0.00  | 0.11  | 2  | 12 | 4   | 13  | 3   | 13  | 12  | 18  | 344 | 443 | 7.0 | 8.8 | 5.3  | 11.3 |
|                                 | 1.5 |     | 0.05  |       | 5  |    | 8   |     | 7   |     | 16  |     | 354 |     | 7.8 |     | 8.3  |      |
| 5–10                            | 0.7 | 2.0 | 0.00  | 0.11  | 2  | 7  | 3   | 9   | 8   | 11  | 12  | 18  | 319 | 468 | 7.3 | 8.8 | 5.3  | 11.3 |
|                                 | 1.0 |     | 0.07  |       | 3  |    | 4   |     | 10  |     | 15  |     | 361 |     | 7.9 |     | 8.0  |      |
| 10–15                           | 0.5 | 1.5 | 0.00  | 0.11  | 4  | 9  | 5   | 10  | 3   | 10  | 9   | 38  | 224 | 422 | 7.3 | 8.2 | 5.2  | 6.0  |
|                                 | 0.8 |     | 0.07  |       | 5  |    | 6   |     | 7   |     | 13  |     | 372 |     | 7.8 |     | 5.3  |      |
| 15–20                           | 0.3 | 1.6 | 0.00  | 0.10  | 3  | 12 | 4   | 13  | 4   | 16  | 9   | 27  | 4   | 106 | 6.7 | 7.7 | 4.2  | 4.4  |
|                                 | 1.0 |     | 0.08  |       | 4  |    | 6   |     | 6   |     | 10  |     | 91  |     | 7.4 |     | 4.3  |      |
| 20–25                           | 1   | 95  | 0.0   | 1.2   | 3  | 13 | 4   | 105 | 15  | 75  | 19  | 181 | 0   | 9   | 6.8 | 7.9 | 3.7  | 4.1  |
|                                 | 77  |     | 0.6   |       | 8  |    | 87  |     | 30  |     | 125 |     | 0   |     | 7.5 |     | 3.7  |      |
| 25–30                           | 117 | 193 | 0.0   | 1.8   | 4  | 15 | 122 | 204 | 40  | 133 | 241 | 293 | 0   | 0   | 6.7 | 7.7 | 3.5  | 3.6  |
|                                 | 145 |     | 0.5   |       | 11 |    | 158 |     | 109 |     | 245 |     | 0   |     | 7.3 |     | 3.6  |      |
| 30–35                           | 144 | 144 | 0.4   | 1.7   | 16 | 16 | 161 | 161 | 96  | 96  | 257 | 293 | 0   | 0   | 7.3 | 7.4 | 3.5  | 3.5  |
|                                 | 144 |     | 1.0   |       | 16 |    | 161 |     | 96  |     | 275 |     | 0   |     | 7.4 |     | 3.5  |      |
| 35–bott.                        | 108 | 178 | 0.00  | 1.641 | 4  | 16 | 113 | 191 | 82  | 160 | 244 | 273 | 0   | 0   | 6.7 | 7.6 | 3.5  | 3.6  |
|                                 | 152 |     | 0.52  |       | 12 |    | 166 |     | 91  |     | 263 |     | 0   |     | 7.3 |     | 3.6  |      |
